# Supplementary material for: Room Temperature Direct Electron Beam Lithography in a Condensed Copper Carboxylate
Source: MDPI journal article supplement (doi:10.3390/mi12050580), 2021-05-20
Supplement: s1 [file s1]

**S1 – Impinging Precursor Flux Simulation**

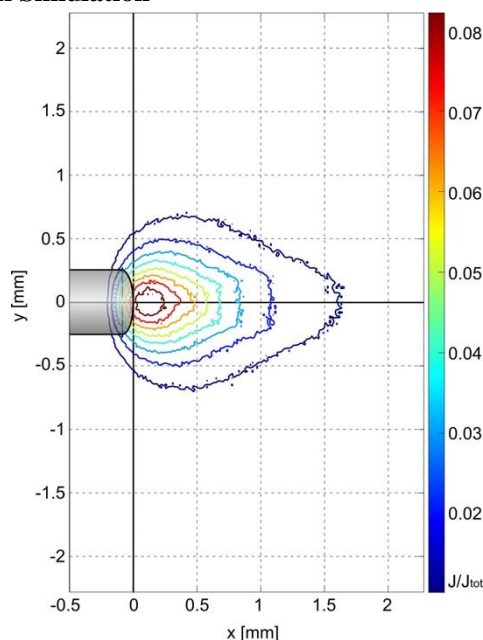

**Figure S1** Simulation of the impinging molecule flux exiting from the nozzle.

Precursor flux simulation arriving on the substrate from a GIS nozzle with 380  $\mu\text{m}$  inner diameter and positioned 200  $\mu\text{m}$  over the substrate surface. The color scheme represents the fraction of molecule flux  $J/J_{\text{tot}}$  arriving on the xy-position on the substrate surface in respect to the total molecule flux  $J_{\text{tot}}$ .  $J_{\text{tot}}$  was determined experimentally using the precursor mass loss measured after the experiment.

The simulation was done using the GIS Simulator [1] with the following simulation parameters:  $10^7$  molecules, 256 grid points, uptake coefficient (in nozzle) = 0, needle length  $l = 4\text{mm}$ , nozzle angle  $\alpha = 70^\circ$ , height above substrate  $h = 200\mu\text{m}$ .

## S2 – Irradiation Pattern and Detailed Parameters

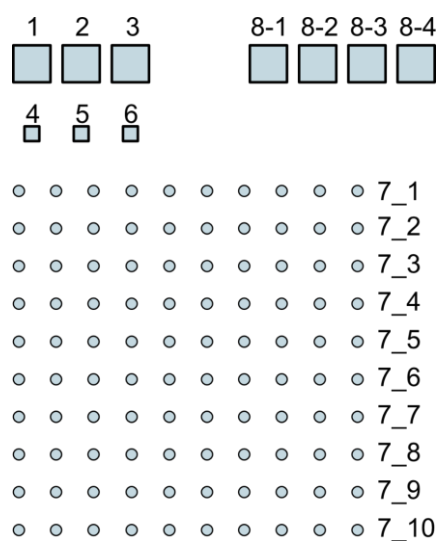

**Figure S2** Irradiation pattern with structure numbers. Detailed irradiation parameters are listed in Table S-3.

**Table S3** Irradiation details of the D-EBL pattern.

|      | size<br>( $\mu\text{m} \times \mu\text{m}$ ) | $t_d$<br>(ns) | repetitions | step size<br>(nm) | e-dose<br>( $\mu\text{C}/\text{cm}^2$ ) |
|------|----------------------------------------------|---------------|-------------|-------------------|-----------------------------------------|
| 1    | 5x5                                          | 3720          | 125         |                   |                                         |
| 2    | 5x5                                          | 1860          | 250         | 150               | $3.26 \cdot 10^{-4}$                    |
| 3    | 5x5                                          | 1120          | 416         |                   |                                         |
| 4    | 2x2                                          | 1000          | 125         |                   |                                         |
| 5    | 2x2                                          | 500           | 250         | 3                 | $3.50 \cdot 10^{-4}$                    |
| 6    | 2x2                                          | 200           | 416         |                   |                                         |
| 7_1  |                                              | 50000         |             |                   | $3.09 \cdot 10^{-2}$                    |
| 7_2  |                                              | 10000         |             |                   | $6.19 \cdot 10^{-3}$                    |
| 7_3  |                                              | 7500          |             |                   | $4.65 \cdot 10^{-3}$                    |
| 7_4  |                                              | 5000          |             |                   | $3.09 \cdot 10^{-3}$                    |
| 7_5  | dot                                          | 4000          | 100000      | 5000              | $2.48 \cdot 10^{-3}$                    |
| 7_6  |                                              | 2000          |             |                   | $1.24 \cdot 10^{-3}$                    |
| 7_7  |                                              | 1000          |             |                   | $6.19 \cdot 10^{-4}$                    |
| 7_8  |                                              | 750           |             |                   | $4.65 \cdot 10^{-4}$                    |
| 7_9  |                                              | 500           |             |                   | $3.09 \cdot 10^{-4}$                    |
| 7_10 |                                              | 200           |             |                   | $1.24 \cdot 10^{-4}$                    |
| 8_1  | 5x5                                          | 500           |             |                   | $1.40 \cdot 10^{-2}$                    |
| 8_2  | 5x5                                          | 1000          | 2500        | 37.5              | $2.80 \cdot 10^{-2}$                    |
| 8_3  | 5x5                                          | 2500          |             |                   | $7.00 \cdot 10^{-2}$                    |
| 8_4  | 5x5                                          | 5000          |             |                   | $1.40 \cdot 10^{-2}$                    |

1. Friedli, V.; Utke, I. Optimized molecule supply from nozzle-based gas injection systems for focused electron- and ion-beam induced deposition and etching: simulation and experiment. *J. Phys. D. Appl. Phys.* **2009**, *42*, 125305, doi:10.1088/0022-3727/42/12/125305.
